# Supplementary material for: Genome‐wide discovery of natural variation in pre‐mRNA splicing and prioritising causal alternative splicing to salt stress response in rice
Source: PubMed Central journal article supplement — New Phytol. 2021 Feb 14;230(3):1273–87. doi: 10.1111/nph.17189 (PMC8048671; doi:10.1111/nph.17189), 2021-02-14
Supplement: NPH-230-1273-s001.pdf [file NPH-230-1273-s001.pdf]

Article title: **Genome-Wide Discovery of Natural Variation in Pre-mRNA Splicing and Prioritizing Causal Alternative Splicing to Salt Stress Response in Rice**

Authors: Huihui Yu, Qian Du, Malachy Campbell, Bin Yu, Harkamal Walia, Chi Zhang  
 Article acceptance date: 04 January 2021

The following Supporting Information is available for this article:

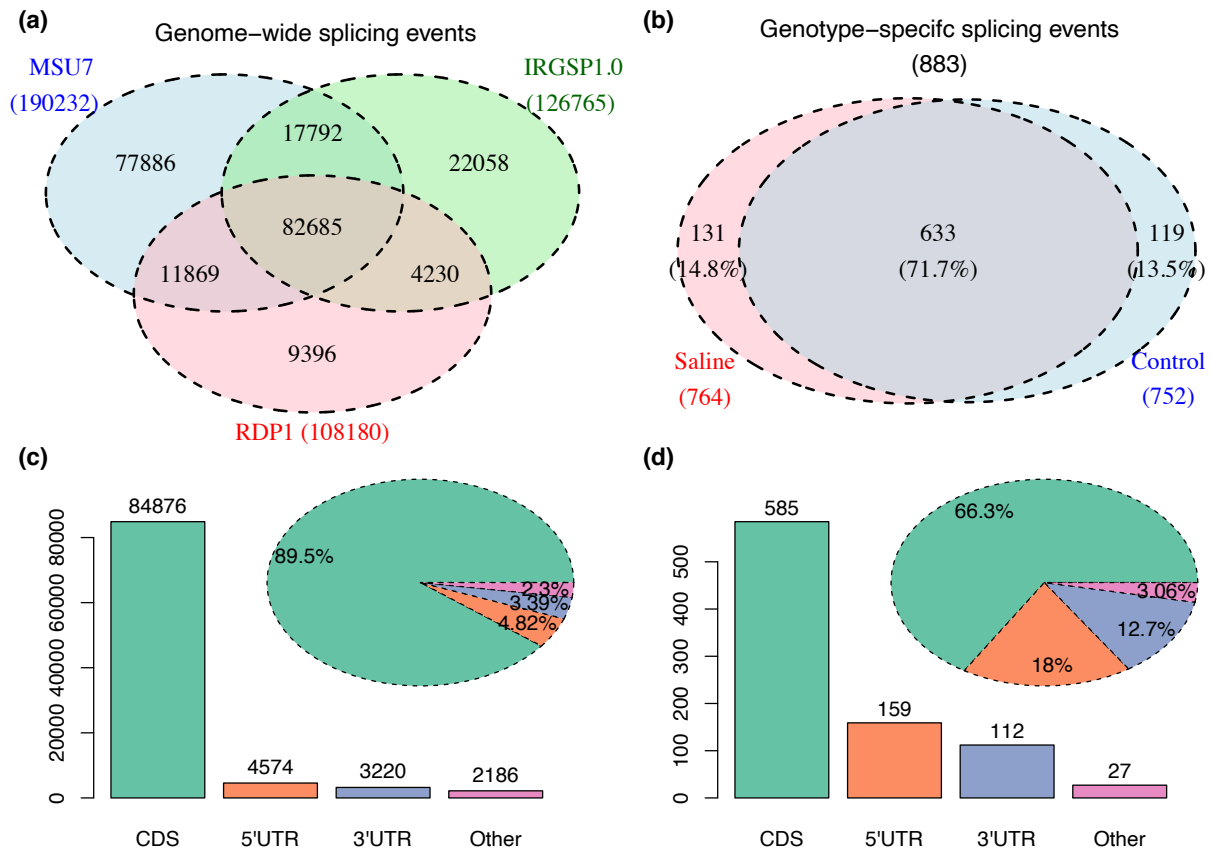

**Figure S1. Splicing events identified by VaSP in RDP1 population.** (a) Venn diagram of genome-wide splicing events identified in RDP1 (Rice Diversity Panel 1) population, annotated by MSU7 (<http://rice.plantbiology.msu.edu>) and by RAP-DB/IRGSP1.0 (<https://rapdb.dna.affrc.go.jp>). (b) Venn diagram of GSS events identified in control and salt stress conditions. (c) Distribution of genome-wide splicing events in different gene regions. (d) Distribution of GSS events in different gene regions. CDS, coding sequence; 5'UTR, 5 prime untranslated regions; 3'UTR, 3 prime untranslated regions; Other, unannotated or untranslated gene regions.

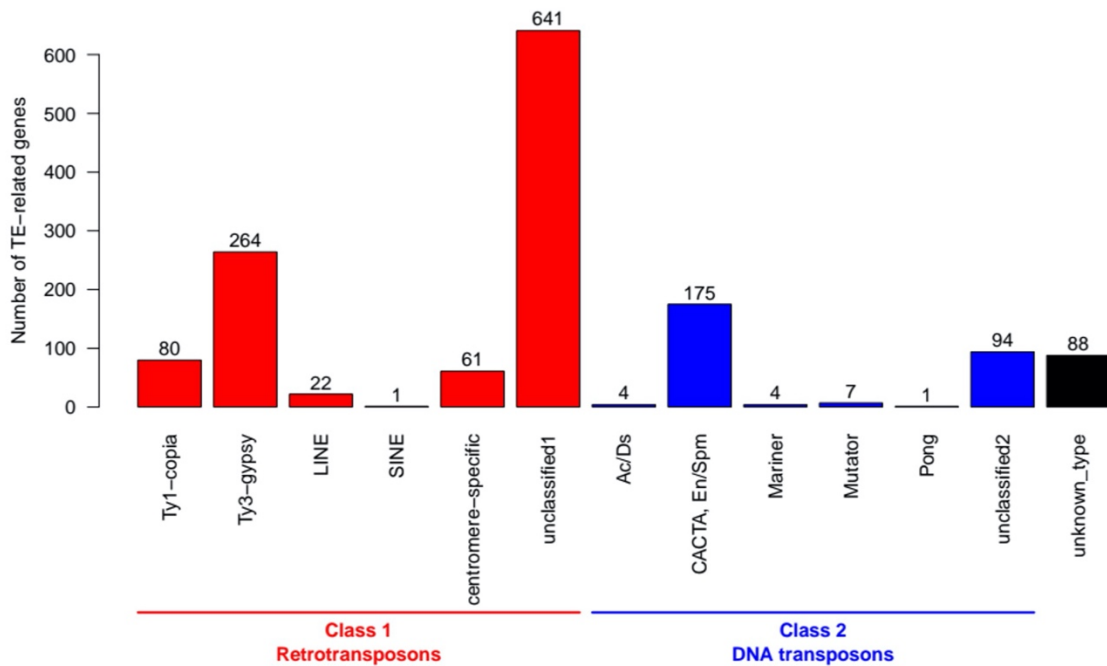

**Figure S2. Different types of TE (transposable element)-related genes with splice site mutations.**

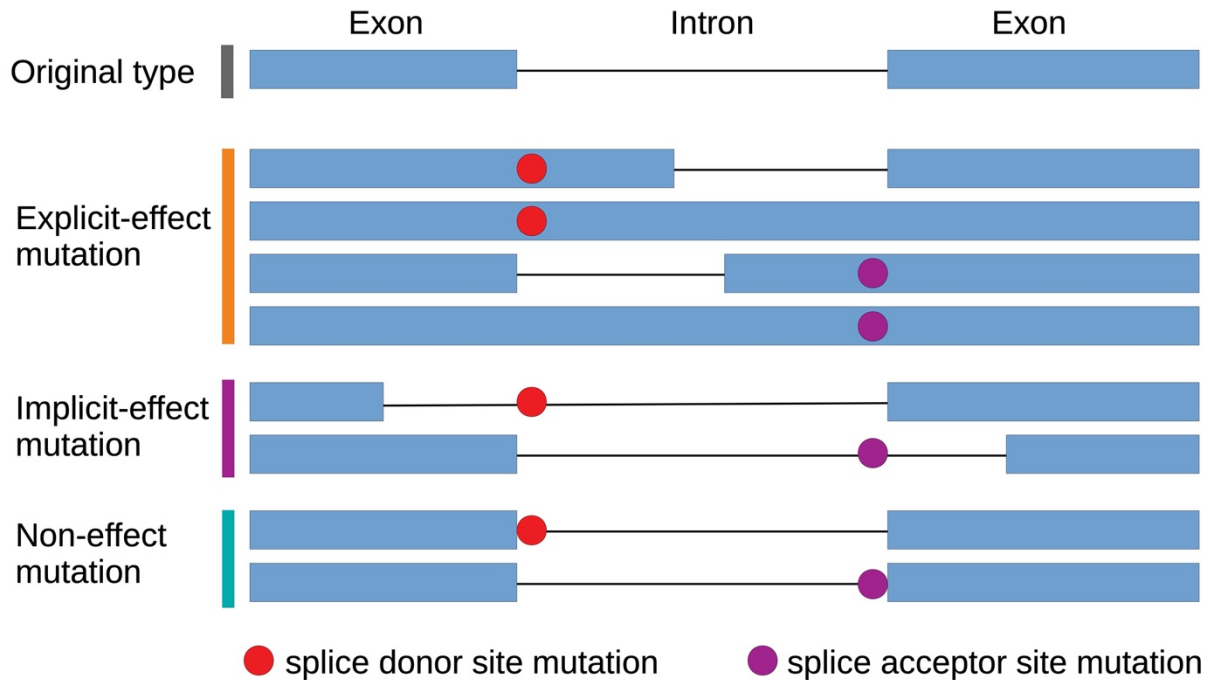

**Figure S3. Classification of splice site mutations.** Based on functions in pre-mRNA splicing regulation, splice site mutations (either in splice donor site or in acceptor site) can be classified into three types: explicit-effect, implicit-effect, and non-effect mutations.

**Table S1. Detailed information of explicit-effect (ex) and implicit-effect (im) of splice site mutations in our dataset.** (see separate file)
